# Supplementary material
Source: PubMed Central journal article supplement (PMC10445691)
Supplement: NIHMS1907518-supplement-authorship_change_form_29.pdf [file NIHMS1907518-supplement-authorship_change_form_29.pdf]

August 29, 2022

Fondazione Policlinico Universitario Agostino Gemelli IRCCS  
Largo A. Gemelli 8  
Rome, 00168  
ITALY

**Re: Changes in Authorship for ONG 22-1212R1 (“Effects of Hospital Surgical Volume on Survival in Early-Stage Cervical Cancer Treated With Radical Hysterectomy”)**

Dear Dr. Bizzarri:

Per your request to remove Andreas Obermair as a coauthor, we need written consent from *all* of the individuals named in the byline of your manuscript. In accordance with Committee on Publication Ethics (COPE) guidelines, *Obstetrics & Gynecology* requires that each coauthor acknowledge this change to the byline. *This includes the existing authors listed below, as well as the one individual who is being removed.*

Please have each individual sign and return this letter to indicate that everyone has reviewed, and approves of, the updated author list for this manuscript. The updated list is to appear as follows:

Authors (in order of appearance):

Nicolò Bizzarri  
Lukáš Dostálek  
Luc R C W van Lonkhuijzen  
Diana Giannarelli  
Aldo Lopez  
Henrik Falconer  
Denis Querleu  
Ali Ayhan  
Sarah H Kim  
David Isla Ortiz  
Jaroslav Klat  
Fabio Landoni  
Juliana Rodriguez  
Ranjit Manchanda  
Jan Kostun  
Pedro T Ramirez  
Mehmet M Meydanli  
Diego Odetto  
Rene Laky  
Ignacio Zapardiel  
Vit Weinberger  
Ricardo Dos Reis  
Luigi Pedone Anchora  
Karina Amaro

Sahar Salehi,  
Huseyin Akilli,  
Nadeem R Abu-Rustum  
Rosa A Salcedo-Hernández  
Veronika Javůrková  
Constantijne H Mom  
Giovanni Scambia  
David Cibula

Being removed:

- Andreas Obermair

I, Rosa A Salcedo-Hernández (PRINT YOUR NAME), confirm that I acknowledge the changes to the final author list for the manuscript. I approve of the author list that is stated above in any subsequent version of the manuscript being considered by *Obstetrics & Gynecology*.

SIGNED: Rosa A Salcedo-Hernández DATE: 9/4/2022

**Return signed consent forms directly to Denise Shields at [dshields@greenjournal.org](mailto:dshields@greenjournal.org).**
