# Supplementary material
Source: PubMed Central journal article supplement (PMC10445691)
Supplement: NIHMS1907518-supplement-Supplemental_Digital_Content.pdf [file NIHMS1907518-supplement-Supplemental_Digital_Content.pdf]

**Appendix 1. Baseline Patients' Characteristics Before Propensity Score Matching (n=2,157)**

|                           | High-volume centers (N=619) | Mid-volume centers (N=1349) | Low-volume centers (N=189) | P-value |
|---------------------------|-----------------------------|-----------------------------|----------------------------|---------|
| Age (years) (mean ± SD)   | 44.7 ± 10.3                 | 48.4 ± 11.6                 | 46.2 ± 10.7                | <0.0001 |
| Pathological stage        |                             |                             |                            | 0.001   |
| IB1                       | 567 (91.6%)                 | 1158 (85.8%)                | 158 (83.6%)                |         |
| IB2                       | 38 (6.1%)                   | 114 (8.5%)                  | 23 (12.2%)                 |         |
| IIA1                      | 14 (2.3%)                   | 77 (5.7%)                   | 8 (4.2%)                   |         |
| Histology                 |                             |                             |                            | 0.16    |
| Squamous                  | 383 (61.9%)                 | 877 (65.0%)                 | 119 (63.0%)                |         |
| Adenocarcinoma            | 193 (31.2%)                 | 383 (28.4%)                 | 48 (25.4%)                 |         |
| Adenosquamous             | 27 (4.4%)                   | 61 (4.5%)                   | 16 (8.5%)                  |         |
| Others                    | 16 (2.5%)                   | 28 (2.1%)                   | 3 (1.6%)                   |         |
| Unknown                   | 0                           | 0                           | 3 (1.6%)                   |         |
| Grade                     |                             |                             |                            | <0.0001 |
| 1                         | 27 (4.4%)                   | 182 (13.5%)                 | 32 (16.9%)                 |         |
| 2                         | 540 (87.2%)                 | 829 (61.5%)                 | 81 (42.9%)                 |         |
| 3                         | 52 (8.4%)                   | 338 (25.1%)                 | 76 (40.2%)                 |         |
| LVSI                      |                             |                             |                            | <0.0001 |
| No                        | 277 (44.7%)                 | 644 (47.7%)                 | 107 (56.6%)                |         |
| Yes                       | 169 (27.3%)                 | 531 (39.4%)                 | 54 (28.6%)                 |         |
| Unknown                   | 173 (27.9%)                 | 174 (12.9%)                 | 28 (14.8%)                 |         |
| Diameter (mm) (mean ± SD) | 20.2 ± 12.1                 | 23.3 ± 13.2                 | 23.8 ± 13.5                | <0.0001 |
| Diameter                  |                             |                             |                            | <0.0001 |
| ≤ 20 mm                   | 379 (61.2%)                 | 703 (52.1%)                 | 93 (49.2%)                 |         |
| > 20 mm                   | 240 (38.8%)                 | 646 (47.9%)                 | 96 (50.8%)                 |         |
| Surgical Approach         |                             |                             |                            | 0.016   |
| Open                      | 429 (69.3%)                 | 871 (64.6%)                 | 111 (58.7%)                |         |
| Others                    | 190 (30.7%)                 | 478 (35.4%)                 | 78 (41.3%)                 |         |
| Adjuvant therapy          |                             |                             |                            | <0.0001 |
| No                        | 557 (90.0%)                 | 813 (60.3%)                 | 127 (67.2%)                |         |
| Yes                       | 62 (10.0%)                  | 536 (39.7%)                 | 62 (32.8%)                 |         |

Bizzari N, Dostálek L, van Lonkhuijzen LRCW, Giannarelli D, Falconer H, Querleu D, et al. Association of hospital surgical volume with survival in early-stage cervical cancer treated with radical hysterectomy. *Obstet Gynecol* 2023;141.

The authors provided this information as a supplement to their article.

©2022 American College of Obstetricians and Gynecologists.

**Appendix 2. Survival Associated With Continuous Cutoffs of Average Radical Hysterectomies Performed in Each Center Every Year\***

| Average N RH ≤ vs > | N of pts    | % DFS        | P value | Difference in % (95% CI) |
|---------------------|-------------|--------------|---------|--------------------------|
| Cut-off 4           | 38 vs 2119  | 80.9 vs 88.8 | 0.44    | -7.9%<br>(-20.5; +4.7%)  |
| Cut-off 5           | 134 vs 2023 | 79.1 vs 89.2 | 0.002   | -10.1%<br>(-17.1; -3.1%) |
| Cut-off 6           | 189 vs 1968 | 81.5 vs 89.2 | 0.002   | -7.7%<br>(-13.4%; -2.0%) |
| Cut-off 8           | 337 vs 1820 | 85.2 vs 89.1 | 0.03    | -3.9%<br>(-7.9%; +0.2%)  |
| Cut-off 9           | 577 vs 1580 | 88.0 vs 88.8 | 0.75    | -0.8%<br>(-3.9%; +2.3%)  |
| Cut-off 10          | 643 vs 1514 | 87.1 vs 89.3 | 0.23    | -2.2%<br>(-5.2%; +0.8%)  |
| Cut-off 12          | 763 vs 1394 | 88.0 vs 89.0 | 0.55    | -1.0%<br>(-3.8%; +1.8%)  |
| Cut-off 14          | 896 vs 1261 | 87.4 vs 89.5 | 0.21    | -2.1%-<br>(4.9%; +0.6%)  |
| Cut-off 15          | 1218 vs 939 | 87.2 vs 90.7 | 0.016   | -3.5%<br>(-6.1%; -0.9%)  |
| Cut-off 16          | 1375 vs 782 | 87.7 vs 90.1 | 0.07    | -2.4%<br>(-5.1%; +0.3%)  |
| Cut-off 17          | 1538 vs 619 | 87.2 vs 92.3 | <0.0001 | -5.1%<br>(-7.8%; -2.4%)  |

\* Cut-offs of 7, 11 and 13 are missing as no center had performed such average number of radical hysterectomies per year

Bizzari N, Dostálek L, van Lonkhuijzen LRCW, Giannarelli D, Falconer H, Querleu D, et al. Association of hospital surgical volume with survival in early-stage cervical cancer treated with radical hysterectomy. *Obstet Gynecol* 2023;141.

The authors provided this information as a supplement to their article.

©2022 American College of Obstetricians and Gynecologists.

**Appendix 3. Timeframe in Which Patients Were Operated in the Different Surgical Volume Groups\***

|                  | <i>Low-volume centers</i> | <i>Middle-volume centers</i> | <i>High-volume centers</i> | <i>p-value</i> |
|------------------|---------------------------|------------------------------|----------------------------|----------------|
| <b>2007-2009</b> | 44 (23%)                  | 363 (27%)                    | 127 (33%)                  | 0.015          |
| <b>2010-2012</b> | 56 (30%)                  | 402 (30%)                    | 102 (27%)                  |                |
| <b>2013-2015</b> | 59 (31%)                  | 459 (34%)                    | 114 (30%)                  |                |
| <b>2016</b>      | 30 (16%)                  | 125 (9%)                     | 40 (10%)                   |                |

\* *RH year is missing for 236 patients*

Bizzari N, Dostálek L, van Lonkhuijzen LRCW, Giannarelli D, Falconer H, Querleu D, et al. Association of hospital surgical volume with survival in early-stage cervical cancer treated with radical hysterectomy. *Obstet Gynecol* 2023;141.

The authors provided this information as a supplement to their article.

©2022 American College of Obstetricians and Gynecologists.

#### Appendix 4. Proportional Hazard Model Before Propensity Score Matching Affected Disease-Free Survival

|                   | UNIVARIATE<br>HR (95% CI) |          | MULTIVARIATE (all variables)<br>HR (95% CI) |          |
|-------------------|---------------------------|----------|---------------------------------------------|----------|
| Age in years      | 1.01 (1.00-1.02)          | p=0.07   | 1.01 (0.99-1.02)                            | p=0.22   |
| Stage             |                           | p<0.0001 |                                             | p=0.001  |
| 1b1               | 1.00                      |          | 1.00                                        |          |
| 1b2               | 2.28 (1.58-3.29)          |          | 1.62 (1.09-2.41)                            |          |
| 2a1               | 2.50 (1.62-3.85)          |          | 2.07 (1.31-3.26)                            |          |
| LVSI              |                           | p<0.0001 |                                             | p=0.002  |
| No                | 1.00                      |          | 1.00                                        |          |
| Yes               | 1.87 (1.43-2.44)          |          | 1.59 (1.19-2.13)                            |          |
| unknown           | 0.33 (0.53-1.24)          |          | 0.88 (0.57-1.36)                            |          |
| Grade             |                           | p<0.0001 |                                             | p=0.004  |
| 1                 | 1.00                      |          | 1.00                                        |          |
| 2                 | 2.81 (1.49-5.33)          |          | 3.01 (1.56-5.81)                            |          |
| 3                 | 4.10 (2.11-7.95)          |          | 3.05 (1.54-6.06)                            |          |
| Adjuvant therapy  |                           | p<0.0001 |                                             | p=0.20   |
| No                | 1.00                      |          | 1.00                                        |          |
| Yes               | 1.84 (1.42-2.36)          |          | 0.82 (0.60-1.11)                            |          |
| Diameter          |                           | p<0.0001 |                                             | p<0.0001 |
| ≤ 20 mm           | 1.00                      |          | 1.00                                        |          |
| > 20 mm           | 2.51 (1.93-3.27)          |          | 2.15 (1.61-2.88)                            |          |
| Surgical Approach |                           | p=0.001  |                                             | p<0.0001 |
| Open              | 1.00                      |          | 1.00                                        |          |
| Others            | 1.57 (1.22-2.02)          |          | 1.89 (1.45-2.46)                            |          |
| Histotype         |                           | p<0.0001 |                                             | p<0.0001 |
| Squamous          | 1.00                      |          | 1.00                                        |          |
| Adenocarcinoma    | 0.83 (0.62-1.13)          |          | 1.16 (0.84-1.60)                            |          |
| Other             | 2.40 (1.68-3.43)          |          | 2.61 (1.81-3.77)                            |          |
| Volume per year   |                           | p<0.0001 |                                             | p=0.003  |
| <7                | 1.00                      |          | 1.00                                        |          |
| 7-17              | 0.66 (0.46-0.96)          |          | 0.66 (0.45-0.96)                            |          |
| >17               | 0.39 (0.25-0.60)          |          | 0.44 (0.28-0.71)                            |          |

Bizzari N, Dostálek L, van Lonkhuijzen LRCW, Giannarelli D, Falconer H, Querleu D, et al. Association of hospital surgical volume with survival in early-stage cervical cancer treated with radical hysterectomy. *Obstet Gynecol* 2023;141.

The authors provided this information as a supplement to their article.

©2022 American College of Obstetricians and Gynecologists.
